# Supplementary material
Source: PubMed Central journal article supplement (PMC2770602)
Supplement: mmc1.pdf [file mmc1.pdf]

Biophysical Journal, Volume 97

**Supporting Material**

**A Simple and Highly Sensitive Method for Magnetic Nanoparticle Quantitation  
Using  $^1\text{H}$ -NMR Spectroscopy**

Jonathan Gunn, Rajan Paranji, and Miqin Zhang

## Supporting Information

### **A Simple and Highly Sensitive Method for Magnetic Nanoparticle Quantitation Using $^1\text{H}$ -NMR Spectroscopy**

Jonathan Gunn<sup>1</sup>, Rajan K Paranj<sup>2</sup>, and Miqin Zhang<sup>1,3,4,5</sup>

<sup>1</sup>*Department of Materials Science & Engineering, University of Washington, Seattle, Washington 98195, USA*

<sup>2</sup>*Department of Chemistry, University of Washington, Seattle, Washington 98185, USA*

<sup>3</sup>*Department of Neurological Surgery, University of Washington, Seattle, Washington 98195, USA*

<sup>4</sup>*Department of Radiology, University of Washington, Seattle, Washington 98195, USA*

<sup>5</sup>*Department of Orthopaedics and Sports Medicine, Seattle, Washington, 98195, USA*

Correspondence should be addressed to M. Z. ([mzhang@u.washington.edu](mailto:mzhang@u.washington.edu))

## Supplementary Figures

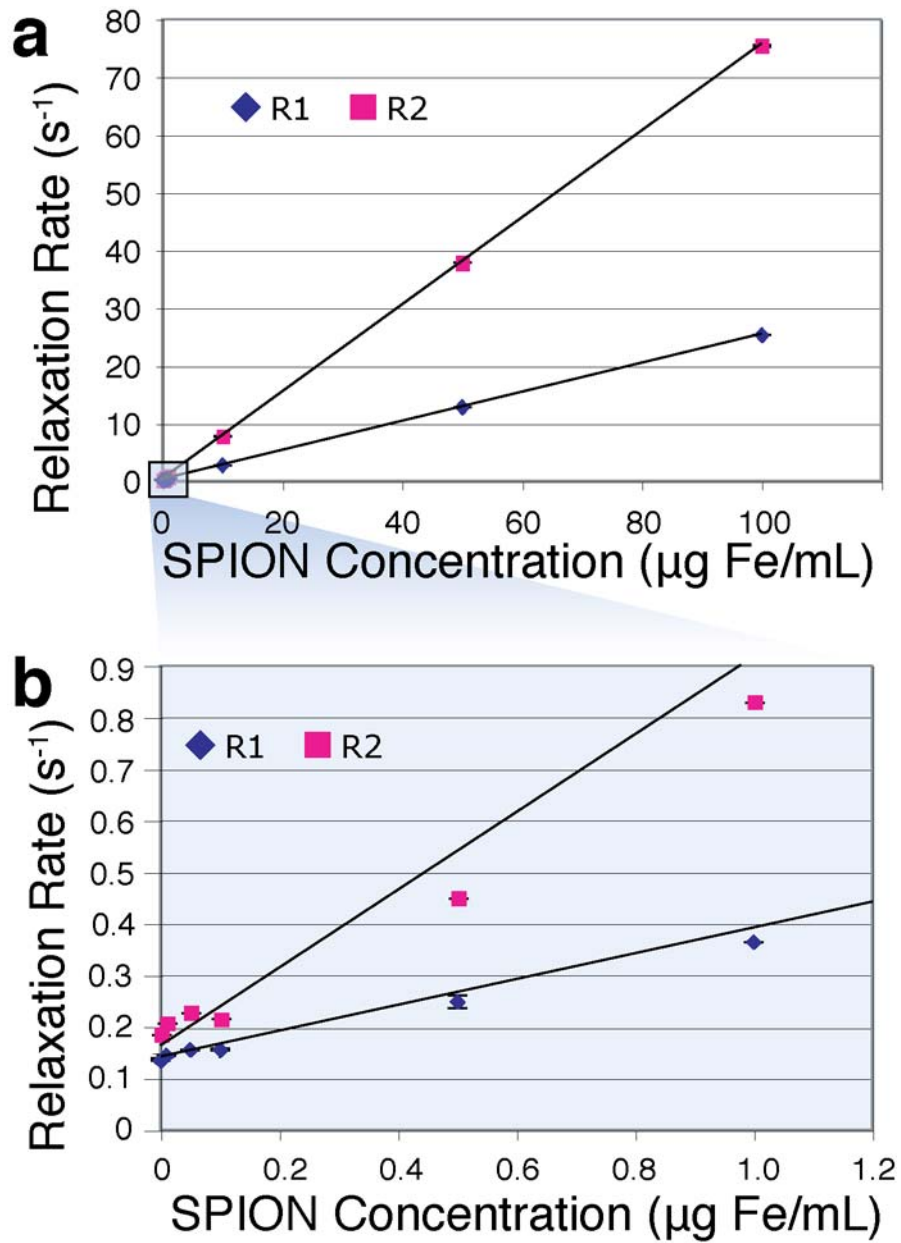

**Supplementary Figure 1.** Analysis of uncoated SPIONs. Linear correlations between the concentration of dissolved, uncoated iron-oxide nanoparticles and the  $R_1$  and  $R_2$  of sample water were observed at 0–100  $\mu\text{g Fe/mL}$ .

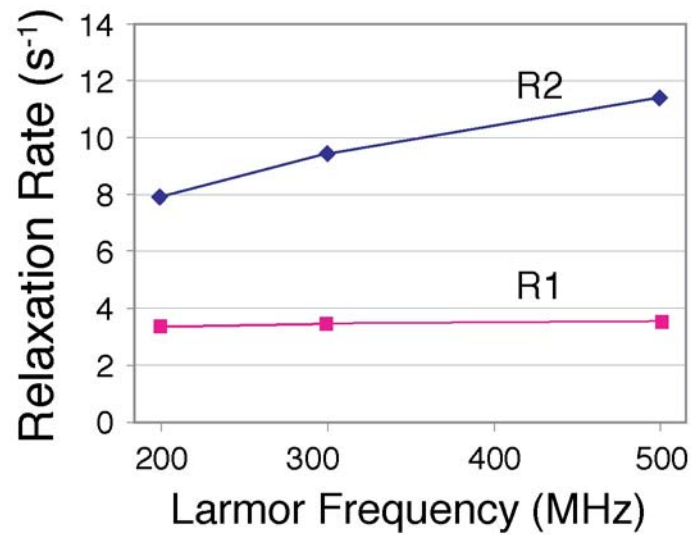

**Supplementary Figure 2.**  $R_1$  and  $R_2$  of Feridex SPION samples of 10 $\mu$ g/mL concentration in DCI at three NMR frequencies: 200, 300, and 500 Mhz.  $R_2$  shows a frequency dependence while  $R_1$  is essentially unchanged across different NMR frequencies, making it a universal indicator of concentration even when different spectrometers are combined to perform the quantification assays.

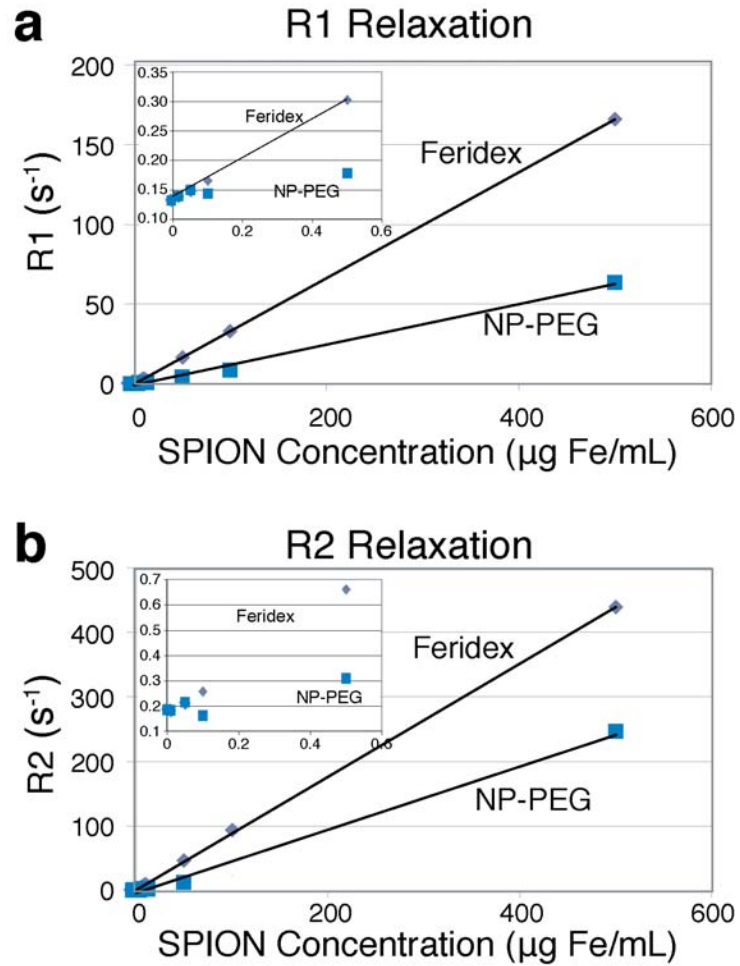

**Supplementary Figure 3.** Analysis of coated SPIONs. Linear correlations of SPION concentration with (a)  $R_1$  and (b)  $R_2$  are observed at varying concentration ranges. SPIONs coated with dextran (Feridex) and PEG (NP-PEG) were individually tested. Linear fits were prepared across the entire range of iron concentrations.
